# Supplementary material for: Tetraspanin 1 promotes endometriosis leading to ovarian clear cell carcinoma
Source: PubMed Central journal article supplement (PMC8024726; doi:10.1002/1878-0261.12884), 2021-01-07
Supplement: MOL2-15-987-s001.pdf [file MOL2-15-987-s001.pdf]

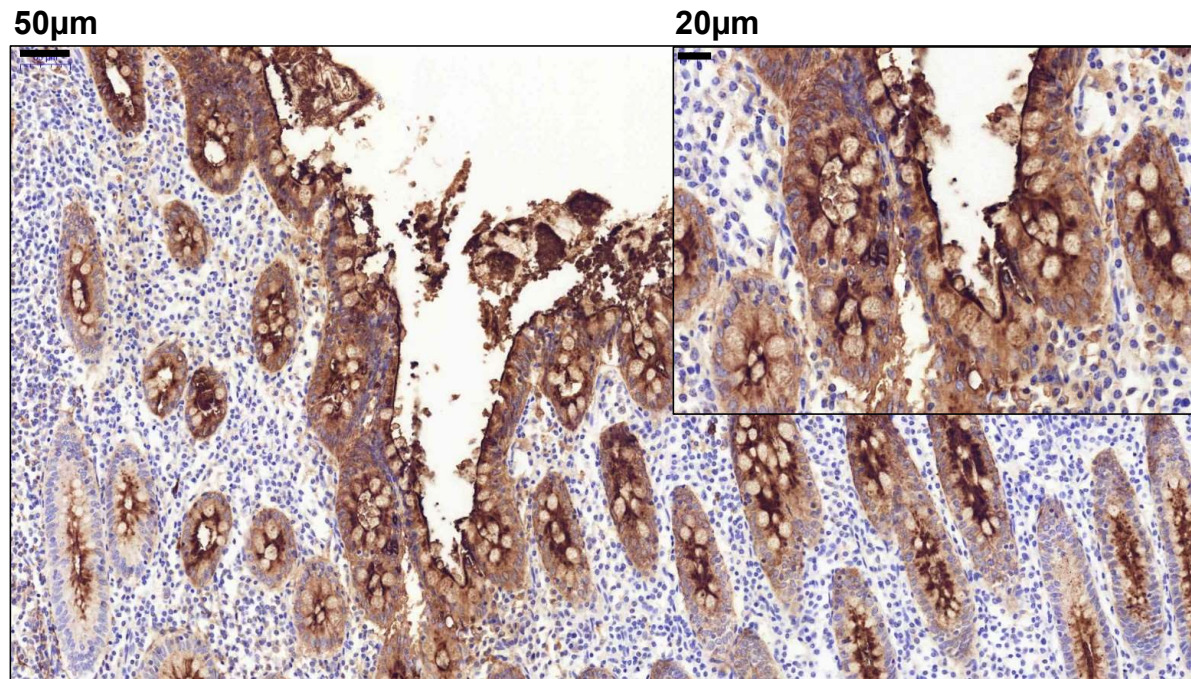

**Fig. S2. Immunohistochemical staining of TSPAN1 in human small intestine tissue.**
