# Supplementary material for: Tetraspanin 1 promotes endometriosis leading to ovarian clear cell carcinoma
Source: PubMed Central journal article supplement (PMC8024726; doi:10.1002/1878-0261.12884), 2021-01-07
Supplement: MOL2-15-987-s002.pdf [file MOL2-15-987-s002.pdf]

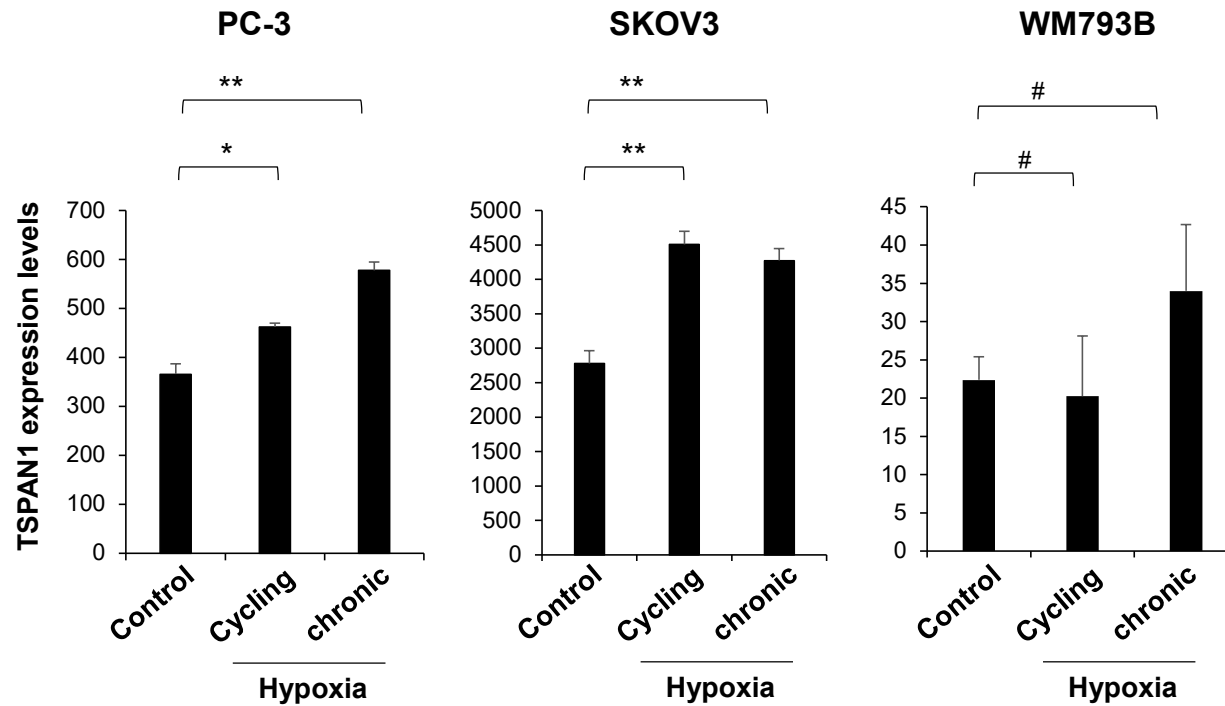

**Fig. S6.** In GSE53012 analysis, TSPAN1 expression was increased in cycling and chronic hypoxic conditions in PC-3 and SKOV3, but not in WM793B. Error bars represent mean  $\pm$  standard error (S.E.). Unpaired t-test was performed. \* $p < 0.05$ , \*\* $p < 0.01$ .
