# Supplementary material for: Tetraspanin 1 promotes endometriosis leading to ovarian clear cell carcinoma
Source: PubMed Central journal article supplement (PMC8024726; doi:10.1002/1878-0261.12884), 2021-01-07
Supplement: MOL2-15-987-s003.pdf [file MOL2-15-987-s003.pdf]

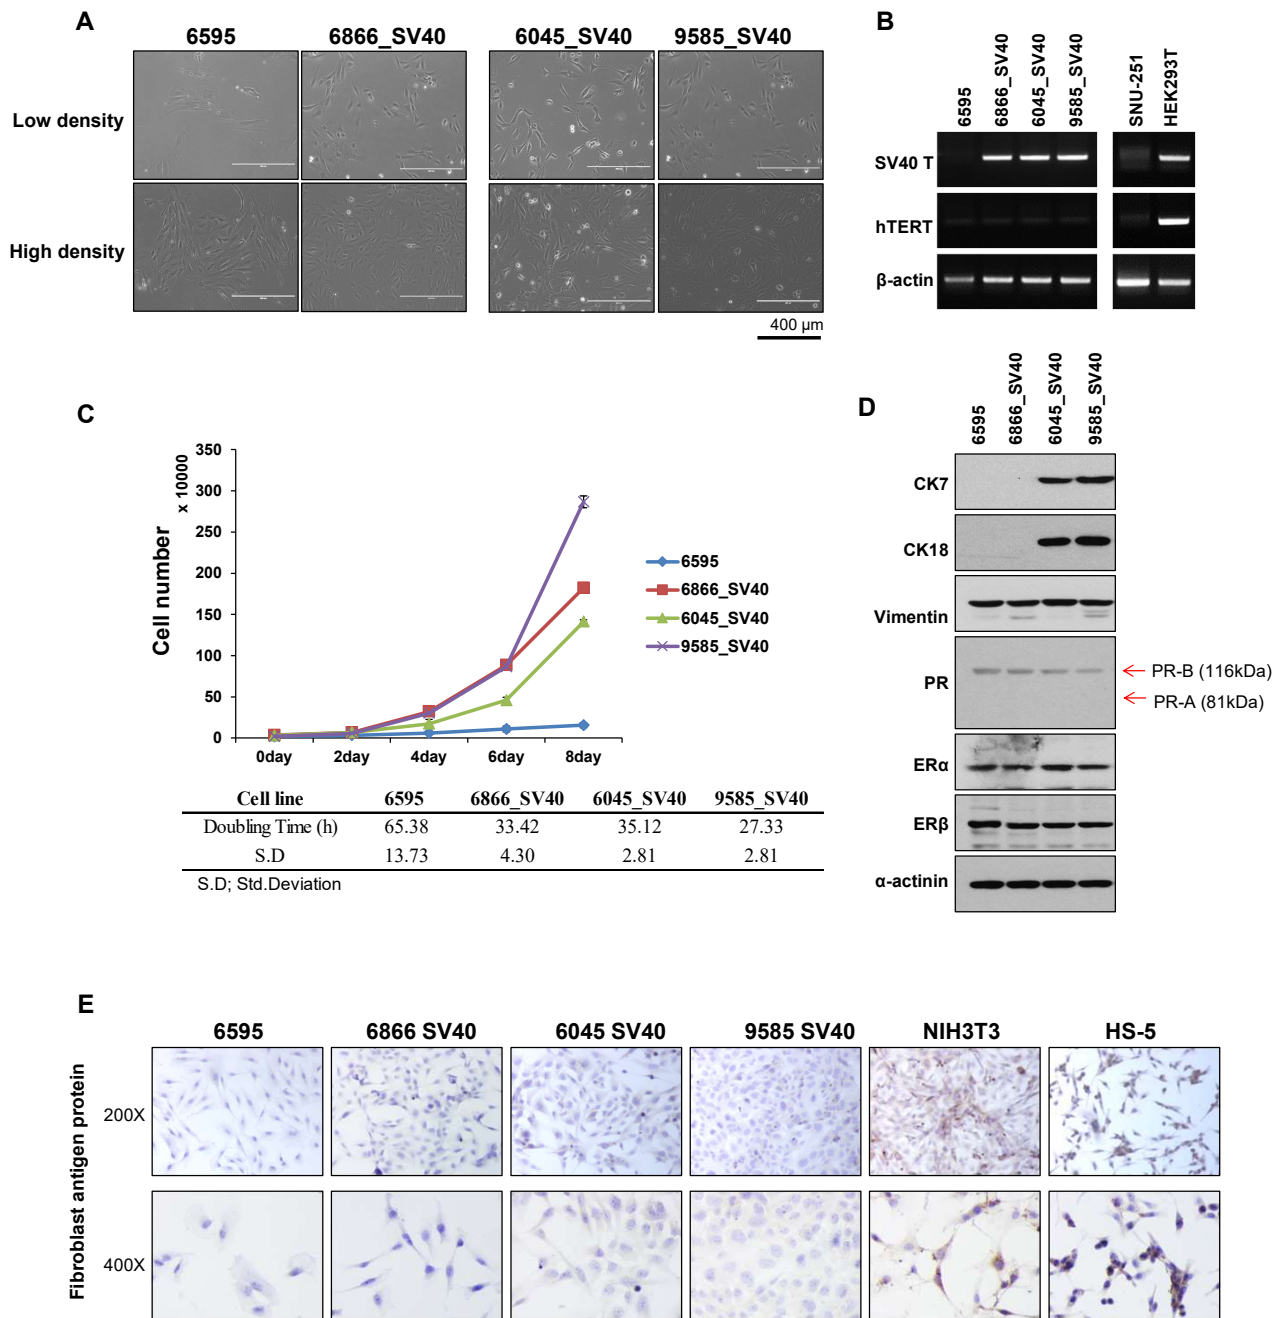

**Fig. S4. Characteristics of the immortalized endometrial (6595, 6866\_SV40) and endometriosis (6045\_SV40, 9585\_SV40) cell lines.**

**A.** Representative images show the morphology of cells. Upper panel shows low density of cells; lower panel shows high density of cells. Scale bar: 400  $\mu$ m, 100 $\times$  magnification. **B.** mRNA levels of SV40 and hTERT were assessed using RT-PCR of cell lines. HEK293T and SNU-251 were the positive and negative controls, respectively, for SV40T and hTERT expression.  $\beta$ -actin expression was included as an internal loading control. **C.** Growth curves and doubling time of cells were determined by counting the cells every 2 d for 8 d. Error bars represent mean  $\pm$  SD. Accompanying table lists the doubling time and SD. **D.** Protein expressions were detected using immunoblotting with  $\alpha$ -actinin as an internal loading control. **E.** Representative immunocytochemical staining images of FAP in cell lines. NIH3T3 and HS-5 were the positive controls for FAP. 200 $\times$  magnification, 400 $\times$  magnification.
