# Supplementary material for: Tetraspanin 1 promotes endometriosis leading to ovarian clear cell carcinoma
Source: PubMed Central journal article supplement (PMC8024726; doi:10.1002/1878-0261.12884), 2021-01-07
Supplement: MOL2-15-987-s004.pdf [file MOL2-15-987-s004.pdf]

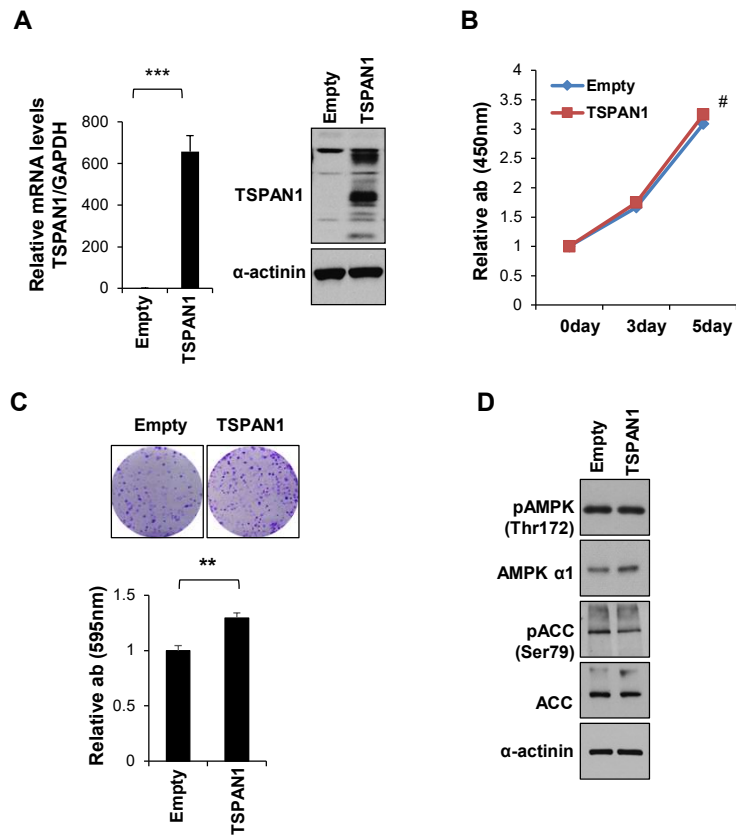

**Fig. S5. TSPAN1 increases cell growth but not cell invasion in the TOV-21G stable cells.**

**A.** TSPAN1 expression was detected by real-time PCR (left panel) and immunoblotting (right panel) in the TOV-21G stable cell line, with  $\alpha$ -actinin as an internal loading control. Data are expressed as the mean  $\pm$  standard error (S.E.);  $n = 3$ . Unpaired t-test was performed. \*\*\* $p < 0.001$ . **B.** Cell proliferation was determined via WST-1 at various times in the TOV-21G stable cell line. Error bars represent mean  $\pm$  S.E.;  $n = 3$ . **C.** Colony forming assay was performed in TOV-21G stable cells. Upper panel shows representative images; lower panel shows the relative absorbance at 595 nm. Error bars represent mean  $\pm$  S.E.;  $n = 3$ . Unpaired t-test was performed. \*\* $p < 0.01$ . **D.** Protein expressions were detected using immunoblotting in the TOV-21G stable cell line with  $\alpha$ -actinin as an internal loading control.
