# Supplementary material for: Tetraspanin 1 promotes endometriosis leading to ovarian clear cell carcinoma
Source: PubMed Central journal article supplement (PMC8024726; doi:10.1002/1878-0261.12884), 2021-01-07
Supplement: MOL2-15-987-s007.pdf [file MOL2-15-987-s007.pdf]

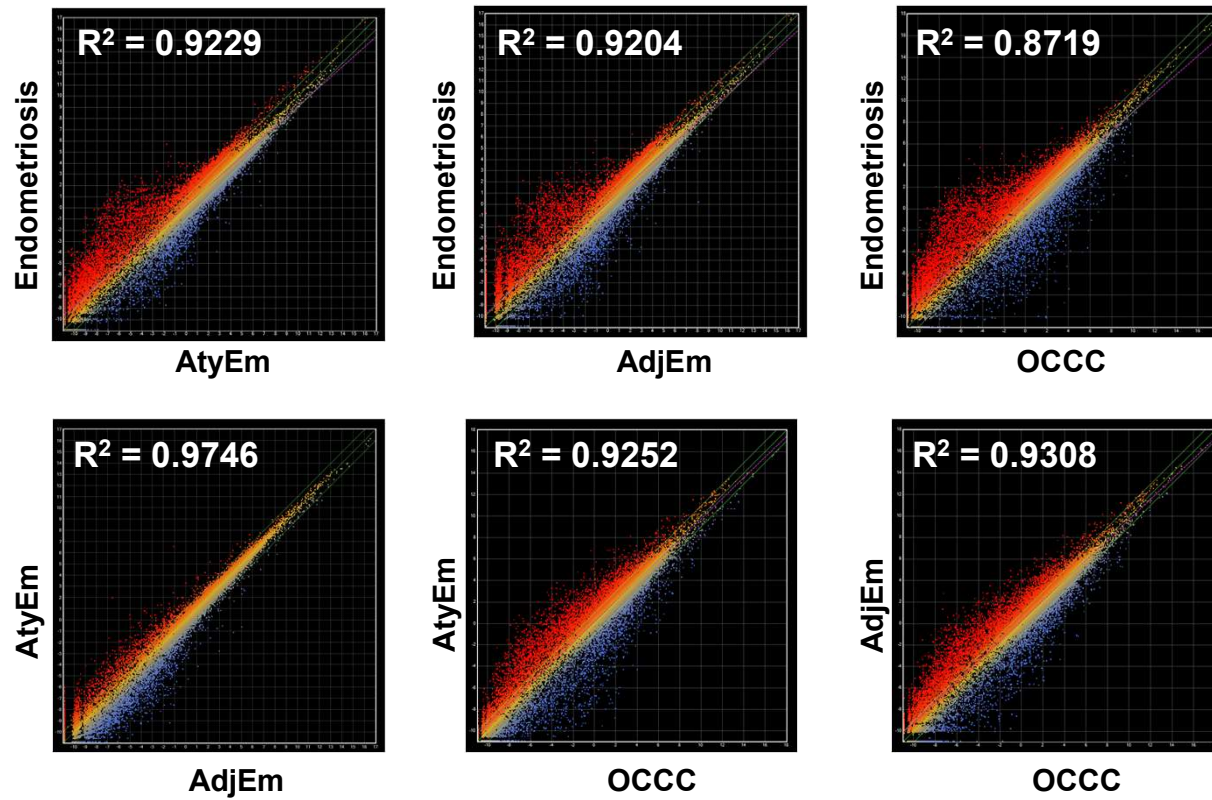

Fig. S3. Linear correlation analysis using scatter plots of the six different two-group comparisons.
