# Supplementary material for: Tetraspanin 1 promotes endometriosis leading to ovarian clear cell carcinoma
Source: PubMed Central journal article supplement (PMC8024726; doi:10.1002/1878-0261.12884), 2021-01-07
Supplement: MOL2-15-987-s008.pdf [file MOL2-15-987-s008.pdf]

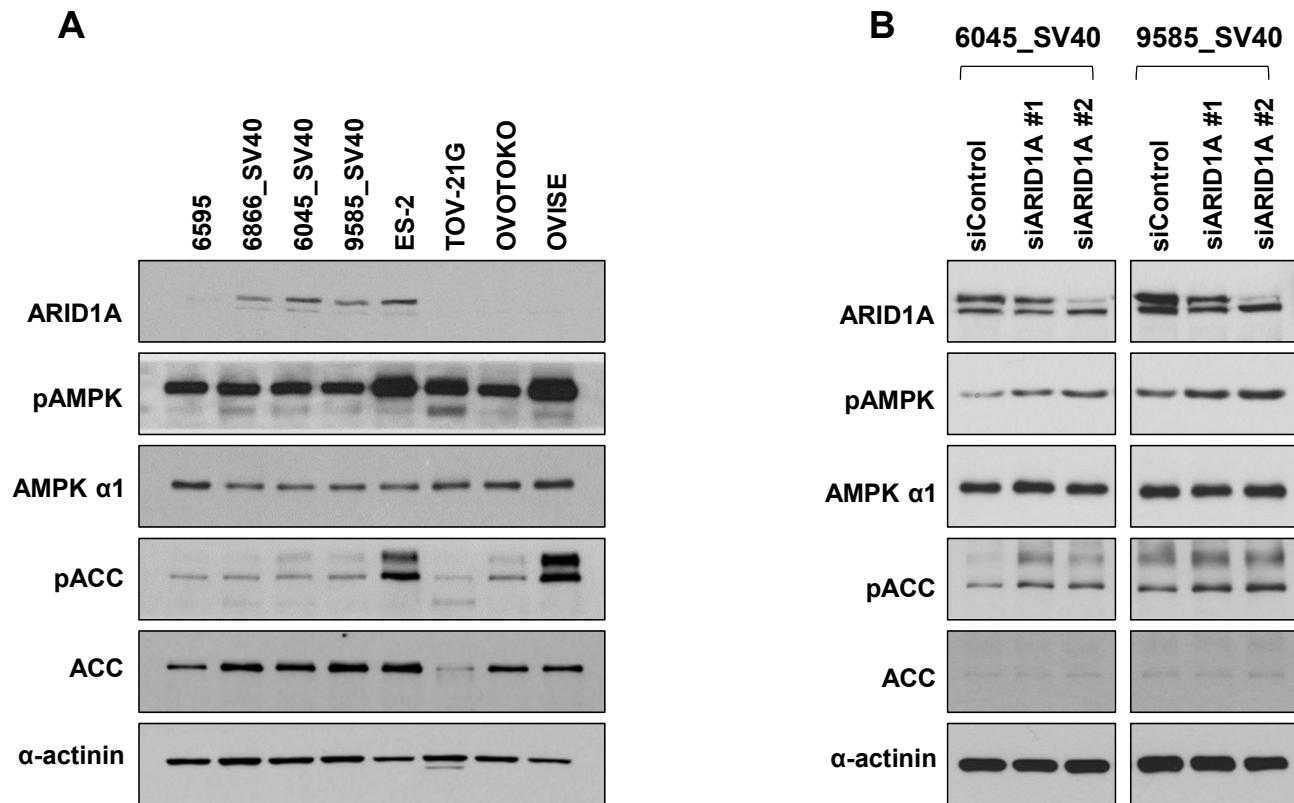

**Fig. S7. AMPK activity is high in OCCC and is increased by ARID1A knockdown.**

**A.** Protein levels of ARID1A, pAMPK (Thr172), AMPK alpha1, pACC (Ser79), and ACC were assessed via immunoblotting, with  $\alpha$ -actinin as an internal loading control. **B.** Protein expressions were detected by immunoblotting after transient transfection of siControl or siARID1A in the 6045\_SV40 and 9585\_SV40 stable cell lines, with  $\alpha$ -actinin as an internal loading control.
